# Supplementary material
Source: publisher figshare collection journal article supplement (https://future-science-group.figshare.com/ndownloader/files/28532733)
Supplement: Supplementary file 1 [file 28532733]

## Sheet: Sheet1
Gene	Group	R	P	KME	KWI
ADCYAP1	black	0.599542	1.20044e-17	0.599542	2.41143
LOC149217	black	0.344229	2.37928e-06	0.344229	0.852709
LOC145053	black	0.542903	4.9531e-14	0.542903	2.91052
CD36	black	0.534481	1.29898e-13	0.534481	1.14211
CDH19	black	0.50465	3.53524e-12	0.50465	0.665223
CHL1	black	0.781506	1.32781e-36	0.781506	2.81781
CNTN2	black	0.582561	1.65735e-16	0.582561	1.64724
CRHBP	black	0.53995	6.81148e-14	0.53995	3.63164
CRYBB1	black	0.612543	1.37801e-18	0.612543	2.49765
DCLK1	black	0.425833	8.4106e-09	0.425833	0.463353
DLG2	black	0.849389	1.94055e-49	0.849389	2.99585
TMEM236	black	0.481513	4.44361e-11	0.481513	3.44826
LOC648271	black	0.780848	1.62598e-36	0.780848	2.40636
GAP43	black	0.791331	3.979e-38	0.791331	5.48786
GHR	black	0.640507	9.85852e-21	0.640507	1.35203
GRIK3	black	0.753166	1.46975e-32	0.753166	3.44085
HEPN1	black	0.720967	1.37596e-28	0.720967	3.61444
JAKMIP1	black	0.761266	1.18043e-33	0.761266	4.81259
KCNIP1	black	0.509844	2.49118e-12	0.509844	3.70249
LPL	black	0.746496	1.08155e-31	0.746496	4.55354
LRRN3	black	0.855742	5.90948e-51	0.855742	3.49612
SLC25A53	black	0.665651	6.52705e-23	0.665651	1.87667
NLGN4X	black	0.738273	1.17088e-30	0.738273	2.68127
NRXN1	black	0.839579	3.17444e-47	0.839579	2.61673
PLP1	black	0.787248	1.76339e-37	0.787248	5.77526
PMP2	black	0.690533	2.71007e-25	0.690533	2.61253
PRIMA1	black	0.654316	6.63157e-22	0.654316	2.84983
RAB39B	black	0.573409	6.37549e-16	0.573409	0.682609
RAB39A	black	0.531981	1.63291e-13	0.531981	1.35635
S100B	black	0.786739	2.0635e-37	0.786739	5.20736
SAMD3	black	0.614614	1.07009e-18	0.614614	3.46975
SFRP1	black	0.370062	6.8441e-07	0.370062	0.425731
LOC196023	black	0.628829	8.60018e-20	0.628829	3.39737
SLC30A8	black	0.587513	8.07586e-17	0.587513	3.004
SLC4A10	black	0.613149	1.31191e-18	0.613149	4.00872
DOM	black	0.681209	2.23496e-24	0.681209	3.06993
TCTEX1D1	black	0.508601	2.54167e-12	0.508601	0.635748
VIT	black	0.447589	1.33858e-09	0.447589	0.878416
DJ964F7.1	pink	0.783856	3.21295e-37	0.783856	3.33182
ADAMTS8	pink	0.768274	5.55533e-35	0.768274	3.33124
ADCY5	pink	0.760337	6.36276e-34	0.760337	2.41026
ANGPTL1	pink	0.918564	9.61048e-72	0.918564	6.14553
ASB2	pink	0.894783	2.09332e-62	0.894783	6.8804
CASQ2	pink	0.85153	4.07964e-50	0.85153	6.0014
CCDC69	pink	0.849101	1.46997e-49	0.849101	4.4211
CHRDL2	pink	0.841361	8.20817e-48	0.841361	5.2576
CPXM2	pink	0.77991	1.17024e-36	0.77991	3.19073
FILIP1	pink	0.899516	4.71536e-64	0.899516	6.05706
GHRL	pink	0.388379	2.33418e-07	0.388379	0.12343
GPM6A	pink	0.606738	1.77364e-18	0.606738	0.896744
HSPB6	pink	0.941132	9.16696e-84	0.941132	7.89754
MFAP4	pink	0.802347	3.17611e-40	0.802347	3.78018
NEXN	pink	0.81873	3.44009e-43	0.81873	4.26734
NPHS1	pink	0.0515136	0.49345	0.0515136	0.701597
P2RX1	pink	0.117635	0.233636	0.117635	0.834875
P2RY14	pink	0.840944	9.71003e-48	0.840944	4.39799
PDLIM3	pink	0.718953	9.04001e-29	0.718953	2.25503
PGM5	pink	0.897672	2.09871e-63	0.897672	7.00848
PLN	pink	0.87938	1.72019e-57	0.87938	5.93765
PTGS1	pink	0.765338	1.36182e-34	0.765338	2.81988
RSPO1	pink	0.780533	9.9686e-37	0.780533	2.93457
RSPO3	pink	0.786517	1.28859e-37	0.786517	3.17922
LOC105377643	pink	0.729145	6.29685e-30	0.729145	2.17592
SCN2B	pink	0.892398	1.31952e-61	0.892398	5.79217
SCRG1	pink	0.778608	1.73592e-36	0.778608	3.03226
SLC5A7	pink	0.550921	6.72289e-15	0.550921	0.941815
SPARCL1	pink	0.860899	2.04962e-52	0.860899	4.82435
SYNPO2	pink	0.87647	1.19589e-56	0.87647	6.56256
TMEM100	pink	0.495042	7.45562e-12	0.495042	0.32383
TPO	pink	0.688743	1.48357e-25	0.688743	1.63001
SCZD16	pink	0.564387	1.14492e-15	0.564387	1.19909
VIP	pink	0.602228	3.34371e-18	0.602228	1.22403
ABCD2	turquoise	0.809599	1.9546e-40	0.809599	60.4508
ACAP1	turquoise	0.935022	5.40492e-79	0.935022	133.238
ADAM6	turquoise	0.608159	2.3266e-17	0.608159	15.3852
ADAMDEC1	turquoise	0.430709	1.07599e-07	0.430709	4.60024
ADH1A	turquoise	0.0306851	1	0.0306851	2.14775
APM-1	turquoise	0.415225	4.0123e-07	0.415225	6.45682
ADRB2	turquoise	0.391664	2.7175e-06	0.391664	2.87932
AFF3	turquoise	0.516805	1.25021e-11	0.516805	8.00772
KIAA0167	turquoise	0.431161	1.04724e-07	0.431161	3.98803
AIM2	turquoise	0.553572	1.01403e-13	0.553572	10.2422
AMPD1	turquoise	0.433672	8.62014e-08	0.433672	4.27697
ANGPTL6	turquoise	0.814988	2.04981e-41	0.814988	74.8086
LQT4	turquoise	0.364278	1.82303e-05	0.364278	2.30207
ANKRD44	turquoise	0.786537	1.42756e-36	0.786537	54.9673
ANKRD55	turquoise	0.852747	2.40086e-49	0.852747	84.8709
APBB1IP	turquoise	0.889288	1.71374e-59	0.889288	87.5557
APLNR	turquoise	0.570222	9.15702e-15	0.570222	11.2058
APOBEC3H	turquoise	0.73323	3.345e-29	0.73323	35.4438
ARHGAP15	turquoise	0.945608	1.31477e-85	0.945608	125.981
ARHGAP25	turquoise	0.979341	3.81657e-122	0.979341	145.303
ARHGAP30	turquoise	0.967122	1.59433e-104	0.967122	130.642
ARHGAP9	turquoise	0.949355	2.84317e-88	0.949355	131.978
ARHGEF6	turquoise	0.853205	1.86792e-49	0.853205	75.8817
ARL11	turquoise	0.813183	4.40464e-41	0.813183	57.9975
ASGR2	turquoise	-0.0234468	1	-0.0234468	0.682405
BACH2	turquoise	0.882474	2.40069e-57	0.882474	98.7492
BCL2A1	turquoise	0.628174	6.74843e-19	0.628174	18.8488
BCL2	turquoise	0.913692	1.56436e-68	0.913692	102.108
BCORP1	turquoise	0.491797	2.4279e-10	0.491797	6.39931
BEND4	turquoise	0.386078	3.9557e-06	0.386078	2.7706
LOC51722	turquoise	0.964907	4.60122e-102	0.964907	130.629
BLK	turquoise	0.87987	1.47242e-56	0.87987	111.61
BTK	turquoise	0.981004	2.44788e-125	0.981004	146.313
BTLA	turquoise	0.932403	1.57382e-77	0.932403	130.517
C11ORF21	turquoise	0.882152	3.00291e-57	0.882152	92.1394
TMEM52B	turquoise	0.109996	1	0.109996	2.1671
KIAA0226L	turquoise	0.87608	1.86886e-55	0.87608	91.4579
LINC00341	turquoise	0.804889	1.32284e-39	0.804889	54.1395
SYNE3	turquoise	0.648025	1.57536e-20	0.648025	20.6748
LOC101929877	turquoise	0.231766	0.0287681	0.231766	0.524601
MILR1	turquoise	0.371183	1.12812e-05	0.371183	1.80934
SCIMP	turquoise	0.90107	1.46119e-63	0.90107	97.273
C19ORF35	turquoise	0.588148	6.00267e-16	0.588148	13.7364
C1ORF162	turquoise	0.709141	1.98778e-26	0.709141	34.6585
THEMIS2	turquoise	0.682276	1.13307e-23	0.682276	29.1915
FDCSP	turquoise	0.272457	0.00471417	0.272457	1.18198
DCANP1	turquoise	0.79703	2.88766e-38	0.79703	52.2586
C5ORF58	turquoise	0.660384	1.28404e-21	0.660384	22.5486
NUGGC	turquoise	0.763944	3.25701e-33	0.763944	46.4004
CADM3	turquoise	0.54751	2.3704e-13	0.54751	9.53803
LOC105376417	turquoise	0.390395	2.9578e-06	0.390395	3.12158
CAMK4	turquoise	0.582111	1.51224e-15	0.582111	13.0021
CAPN11	turquoise	0.316909	0.000404843	0.316909	0.762442
CBLN1	turquoise	0.0203158	1	0.0203158	1.4363
CCDC102B	turquoise	0.588175	6.00267e-16	0.588175	13.3382
CCDC141	turquoise	0.216521	0.0504114	0.216521	0.429657
CCL17	turquoise	0.401458	1.25105e-06	0.401458	3.13712
CCL19	turquoise	0.874173	6.53331e-55	0.874173	86.9008
CCL21	turquoise	0.782919	5.17947e-36	0.782919	61.3965
CCL22	turquoise	0.731417	5.53629e-29	0.731417	34.4848
CCL23	turquoise	0.268954	0.00544309	0.268954	0.407569
CCL2	turquoise	0.389815	3.03637e-06	0.389815	2.15257
CCL3	turquoise	0.33236	0.000164487	0.33236	1.39421
CCL4L1	turquoise	0.311431	0.00052818	0.311431	1.02618
LAG1	turquoise	0.67416	6.92037e-23	0.67416	23.1982
TCP228	turquoise	0.757754	2.32837e-32	0.757754	43.8519
LOC96488	turquoise	0.31207	0.000528117	0.31207	0.64893
CCR4	turquoise	0.824961	2.52937e-43	0.824961	62.5266
CCR6	turquoise	0.832381	7.92004e-45	0.832381	67.4567
CCR7	turquoise	0.89321	8.54885e-61	0.89321	110.631
CD180	turquoise	0.901631	9.08024e-64	0.901631	96.8738
CD19	turquoise	0.865234	1.79056e-52	0.865234	106.584
CD1A	turquoise	0.221513	0.0432388	0.221513	0.692893
CD1B	turquoise	0.561436	3.333e-14	0.561436	10.6854
CD1C	turquoise	0.768543	7.18349e-34	0.768543	43.8796
CD1D	turquoise	0.874586	5.00744e-55	0.874586	79.8355
HSCDIEL	turquoise	0.592842	2.86227e-16	0.592842	14.7611
FLJ22814	turquoise	0.873507	1.0075e-54	0.873507	107.584
CD244	turquoise	0.387864	3.49215e-06	0.387864	2.25583
CD247	turquoise	0.957528	7.15523e-95	0.957528	135.755
CD27	turquoise	0.903283	2.21756e-64	0.903283	110.482
CD28	turquoise	0.953247	2.8669e-91	0.953247	131.436
CD2	turquoise	0.928681	1.50063e-75	0.928681	109.564
CD300LG	turquoise	0.519496	9.24762e-12	0.519496	8.51277
CD37	turquoise	0.931255	6.53988e-77	0.931255	131.308
CD38	turquoise	0.78699	1.21472e-36	0.78699	50.4594
CD3D	turquoise	0.909218	1.08779e-66	0.909218	109.687
CD3E	turquoise	0.955817	2.17592e-93	0.955817	135.679
CD3G	turquoise	0.915878	1.80168e-69	0.915878	108.497
CD40LG	turquoise	0.867797	3.7215e-53	0.867797	87.5285
CD48	turquoise	0.946766	2.06644e-86	0.946766	135.469
CD52	turquoise	0.917286	4.34138e-70	0.917286	116.595
CD53	turquoise	0.95407	6.20024e-92	0.95407	123.785
CD5	turquoise	0.932294	1.80148e-77	0.932294	117.839
CD69	turquoise	0.882668	2.09775e-57	0.882668	93.8032
CD6	turquoise	0.938315	6.39855e-81	0.938315	125.109
CD72	turquoise	0.867963	3.36482e-53	0.867963	81.2393
CD74	turquoise	0.726844	1.94225e-28	0.726844	34.7871
CD79A	turquoise	0.887321	7.40168e-59	0.887321	113.374
CD79B	turquoise	0.855154	6.33516e-50	0.855154	93.2491
CD7	turquoise	0.837906	5.43226e-46	0.837906	78.697
CD80	turquoise	0.562901	2.70992e-14	0.562901	12.954
CD83	turquoise	0.839381	2.63172e-46	0.839381	66.8636
CD8A	turquoise	0.811076	1.05719e-40	0.811076	58.8425
LOC100509003	turquoise	0.76357	3.65944e-33	0.76357	41.6269
CD96	turquoise	0.943356	4.27582e-84	0.943356	122.121
AC006129.2	turquoise	0.88371	1.00514e-57	0.88371	84.781
CEACAM3	turquoise	0.323755	0.000275272	0.323755	0.887222
CECR1	turquoise	0.470866	2.4054e-09	0.470866	6.17427
CELF2	turquoise	0.872606	1.80571e-54	0.872606	80.256
CETP	turquoise	0.812357	6.20577e-41	0.812357	71.5998
CFP	turquoise	0.758266	1.99025e-32	0.758266	40.1163
CH25H	turquoise	0.443823	3.42106e-08	0.443823	3.55127
YKL39	turquoise	0.808373	3.21351e-40	0.808373	69.5254
CIDEA	turquoise	0.460629	6.95563e-09	0.460629	7.29926
CIITA	turquoise	0.871916	2.80439e-54	0.871916	81.3043
CLC	turquoise	0.115121	1	0.115121	0.329032
CLEC10A	turquoise	0.620811	2.53604e-18	0.620811	18.9447
CLEC17A	turquoise	0.809151	2.34637e-40	0.809151	75.3882
CLEC1A	turquoise	0.445479	2.93945e-08	0.445479	5.2196
CLEC4C	turquoise	0.800155	8.6497e-39	0.800155	56.8922
CLEC4G	turquoise	0.377835	7.19717e-06	0.377835	2.03748
CLEC9A	turquoise	0.815277	1.8168e-41	0.815277	56.4215
CLECL1	turquoise	0.896039	9.19194e-62	0.896039	106.376
LOC154309	turquoise	0.785184	2.31702e-36	0.785184	49.7849
CNR2	turquoise	0.886051	1.86755e-58	0.886051	114.12
CNTFR	turquoise	0.251195	0.0125	0.251195	0.773617
COL19A1	turquoise	0.747252	5.81797e-31	0.747252	51.9554
COL23A1	turquoise	0.42008	2.6871e-07	0.42008	3.07634
CORO1A	turquoise	0.93397	2.12168e-78	0.93397	128.819
CR1	turquoise	0.924253	2.49699e-73	0.924253	111.994
CR2	turquoise	0.816062	1.29873e-41	0.816062	74.5047
CRTAM	turquoise	0.857497	1.68529e-50	0.857497	76.4788
IL3RB	turquoise	0.701783	1.22375e-25	0.701783	32.1067
CST7	turquoise	0.8342	3.32401e-45	0.8342	62.8881
IDDM12	turquoise	0.889532	1.43008e-59	0.889532	90.2218
LYPN	turquoise	0.725322	2.92732e-28	0.725322	33.0803
LOC115545	turquoise	0.874214	6.38116e-55	0.874214	100.038
CXCR2P1	turquoise	0.374968	8.82346e-06	0.374968	5.13189
CXCR4	turquoise	0.905388	3.49637e-65	0.905388	112.593
LOC115271	turquoise	0.870808	5.69182e-54	0.870808	103.454
CXCR6	turquoise	0.673094	8.69012e-23	0.673094	28.1488
CYTH4	turquoise	0.912215	6.50195e-68	0.912215	97.4936
CYTIP	turquoise	0.935475	2.97963e-79	0.935475	125.225
GDXYM	turquoise	0.372033	1.08432e-05	0.372033	2.1906
DNASE1L3	turquoise	0.813524	3.82388e-41	0.813524	62.5643
DOCK10	turquoise	0.80072	6.979e-39	0.80072	55.7273
DOCK2	turquoise	0.954993	1.07306e-92	0.954993	125.643
DOCK8	turquoise	0.900288	2.82284e-63	0.900288	97.3416
DOK2	turquoise	0.700383	1.70494e-25	0.700383	32.1946
DOK3	turquoise	0.886193	1.6882e-58	0.886193	89.4316
DPEP2	turquoise	0.792458	1.63454e-37	0.792458	53.2063
DPPA4	turquoise	0.863181	6.14277e-52	0.863181	83.3671
EBI3	turquoise	0.799815	9.84951e-39	0.799815	50.9173
ADGRE1	turquoise	0.402558	1.15982e-06	0.402558	2.5706
EMR4	turquoise	0.583286	1.26681e-15	0.583286	12.3226
ENPP6	turquoise	0.485721	4.84641e-10	0.485721	5.17577
EOMES	turquoise	0.790488	3.41478e-37	0.790488	54.0259
EVI2A	turquoise	0.840617	1.41248e-46	0.840617	70.6667
EVI2B	turquoise	0.931741	3.59029e-77	0.931741	112.926
FABP4	turquoise	0.471844	2.18755e-09	0.471844	8.21966
FCMR	turquoise	0.915841	1.86074e-69	0.915841	125.957
FAM129C	turquoise	0.789888	4.23495e-37	0.789888	67.9908
FAM159A	turquoise	0.909168	1.13674e-66	0.909168	118.908
FAM26F	turquoise	0.597114	1.42783e-16	0.597114	16.9521
Diff48	turquoise	0.935662	2.32846e-79	0.935662	130.362
FAM78A	turquoise	0.957453	8.3141e-95	0.957453	123.661
FCER1A	turquoise	0.432928	9.12022e-08	0.432928	4.63458
FCER2	turquoise	0.808192	3.44894e-40	0.808192	77.0236
FCRL1	turquoise	0.817496	6.98571e-42	0.817496	83.6965
FCRL2	turquoise	0.842582	5.22358e-47	0.842582	94.9894
FCRL3	turquoise	0.917591	3.18442e-70	0.917591	122.187
FCRL5	turquoise	0.902516	4.27291e-64	0.902516	102.048
FCRL6	turquoise	0.440213	4.75792e-08	0.440213	3.64915
FCRLA	turquoise	0.878012	5.16563e-56	0.878012	110.354
FGD2	turquoise	0.85956	5.13614e-51	0.85956	77.0551
FGD3	turquoise	0.879037	2.59678e-56	0.879037	86.3233
FLI1	turquoise	0.93025	2.25385e-76	0.93025	108.156
FLT3	turquoise	0.450965	1.73275e-08	0.450965	4.56173
FMNL1	turquoise	0.803991	1.89502e-39	0.803991	53.7001
FOSB	turquoise	0.404654	9.84445e-07	0.404654	2.6614
JM2	turquoise	0.870155	8.57653e-54	0.870155	82.3359
FUT7	turquoise	0.840999	1.17157e-46	0.840999	70.9588
FYB	turquoise	0.800234	8.42156e-39	0.800234	57.2319
GAB3	turquoise	0.834552	2.81034e-45	0.834552	67.5752
GAPT	turquoise	0.920136	2.22892e-71	0.920136	105.176
GFRA2	turquoise	0.434397	8.15926e-08	0.434397	3.23004
GIMAP1	turquoise	0.878582	3.53477e-56	0.878582	80.6885
GIMAP4	turquoise	0.903147	2.48795e-64	0.903147	94.7668
GIMAP5	turquoise	0.897886	2.05673e-62	0.897886	89.968
GIMAP7	turquoise	0.897662	2.46493e-62	0.897662	92.5551
GJD3	turquoise	0.459301	7.89984e-09	0.459301	5.50216
GLIPR1	turquoise	0.591492	3.53845e-16	0.591492	14.3386
GMFG	turquoise	0.893585	6.40491e-61	0.893585	90.432
GNGT2	turquoise	0.749417	3.03911e-31	0.749417	42.0985
HCAR2	turquoise	0.0298357	1	0.0298357	0.992765
LOC91492	turquoise	0.0115426	1	0.0115426	1.95281
GPR15	turquoise	0.338739	0.000108987	0.338739	1.04116
GPR171	turquoise	0.895296	1.65868e-61	0.895296	90.5908
GPR174	turquoise	0.870757	5.86383e-54	0.870757	86.7588
GPR183	turquoise	0.774764	8.94349e-35	0.774764	46.5065
GPR18	turquoise	0.923676	4.75341e-73	0.923676	123.109
GPR55	turquoise	0.783087	4.8989e-36	0.783087	51.7256
GPR65	turquoise	0.862918	7.16916e-52	0.862918	79.05
GPR82	turquoise	0.666862	3.28676e-22	0.666862	24.6935
GRAP2	turquoise	0.884034	7.99257e-58	0.884034	86.8595
GTSF1	turquoise	0.714604	4.95008e-27	0.714604	34.7971
FLJ13373	turquoise	0.932178	2.08004e-77	0.932178	120.754
GYPC	turquoise	0.683328	9.03163e-24	0.683328	25.358
GYPE	turquoise	0.755628	4.5223e-32	0.755628	39.4781
GZMA	turquoise	0.705737	4.64144e-26	0.705737	29.0967
GZMB	turquoise	0.669653	1.81482e-22	0.669653	23.9244
GZMH	turquoise	0.485303	5.02615e-10	0.485303	7.07008
GZMK	turquoise	0.875833	2.19709e-55	0.875833	82.956
GZMM	turquoise	0.876095	1.85634e-55	0.876095	89.1754
HAS1	turquoise	0.534132	1.45655e-12	0.534132	8.34725
HAS2	turquoise	0.395397	2.06618e-06	0.395397	2.29071
HCLS1	turquoise	0.937002	3.87311e-80	0.937002	110.346
HCST	turquoise	0.834994	2.27291e-45	0.834994	67.2167
HLA-DOA	turquoise	0.790132	3.88369e-37	0.790132	49.4242
HLA-DOB	turquoise	0.877684	6.43142e-56	0.877684	100.908
LOC221510	turquoise	0.795079	6.07603e-38	0.795079	52.8142
HLA-DPB2	turquoise	0.580006	2.08656e-15	0.580006	13.4455
HLA-DQA2	turquoise	0.597224	1.41304e-16	0.597224	13.2751
LOC221518	turquoise	0.450822	1.73416e-08	0.450822	3.66818
LOC222674	turquoise	0.378667	6.90329e-06	0.378667	1.96083
HLA-DRB5	turquoise	0.41898	2.9213e-07	0.41898	2.60718
HLA-DRB6	turquoise	0.451475	1.68966e-08	0.451475	4.52818
HMOX1	turquoise	0.530478	2.3039e-12	0.530478	8.16675
HSF5	turquoise	0.888757	2.54778e-59	0.888757	101.438
HVCN1	turquoise	0.909942	5.57634e-67	0.909942	109.274
ICOS	turquoise	0.931563	4.46311e-77	0.931563	113.649
IDO2	turquoise	0.832582	7.21648e-45	0.832582	65.6177
LOC100129349	turquoise	0.123658	1	0.123658	0.257227
JCHAIN	turquoise	0.394955	2.10093e-06	0.394955	3.67735
IKZF1	turquoise	0.972508	2.7103e-111	0.972508	146.56
IKZF3	turquoise	0.866187	1.00138e-52	0.866187	87.0515
IL10RA	turquoise	0.934277	1.42715e-78	0.934277	109.716
IL12RB1	turquoise	0.822912	6.3794e-43	0.822912	61.0647
IL16	turquoise	0.91003	5.1507e-67	0.91003	100.186
IL18RAP	turquoise	0.684645	6.76536e-24	0.684645	24.6153
IL21R	turquoise	0.887078	8.83083e-59	0.887078	89.2264
IL24	turquoise	0.422893	2.10575e-07	0.422893	2.59757
IL2RB	turquoise	0.883081	1.5704e-57	0.883081	89.0438
IL5RA	turquoise	0.368451	1.35849e-05	0.368451	1.38824
IL6	turquoise	0.453335	1.41423e-08	0.453335	4.55122
IL7R	turquoise	0.838425	4.23812e-46	0.838425	71.4743
IL9R	turquoise	0.617866	4.2704e-18	0.617866	16.2573
LOC154397	turquoise	0.935672	2.30435e-79	0.935672	119.544
IRF8	turquoise	0.838206	4.69412e-46	0.838206	74.6126
ITGA4	turquoise	0.856442	3.07171e-50	0.856442	78.1656
LOC197414	turquoise	0.527424	3.3797e-12	0.527424	7.17549
ITGAL	turquoise	0.97144	7.49613e-110	0.97144	141.725
ITGAX	turquoise	0.519187	9.52359e-12	0.519187	11.5596
ITK	turquoise	0.912726	3.99246e-68	0.912726	113.772
ITM2A	turquoise	0.504844	5.40963e-11	0.504844	6.09713
ITPRIPL1	turquoise	0.685117	6.1089e-24	0.685117	25.2685
KBTBD8	turquoise	0.931621	4.16624e-77	0.931621	121.428
KCNA3	turquoise	0.862633	8.47657e-52	0.862633	82.1243
KCNAB2	turquoise	0.785862	1.81863e-36	0.785862	48.8022
LOC115619	turquoise	0.243793	0.0171139	0.243793	1.72133
KCNQ5	turquoise	0.317367	0.000404843	0.317367	2.5503
KEL	turquoise	0.494333	1.82383e-10	0.494333	9.21542
FAM30A	turquoise	0.889977	1.02695e-59	0.889977	114.98
TESPA1	turquoise	0.920821	1.07519e-71	0.920821	115.4
KIAA0922	turquoise	0.812715	5.35394e-41	0.812715	58.1839
KLHL14	turquoise	0.686513	4.51083e-24	0.686513	32.9218
KLHL6	turquoise	0.913565	1.76759e-68	0.913565	102.9
KLRB1	turquoise	0.854609	8.55211e-50	0.854609	72.345
KLRC4	turquoise	0.438777	5.40045e-08	0.438777	4.35901
KLRD1	turquoise	0.507156	4.12083e-11	0.507156	8.95254
KLRG1	turquoise	0.870132	8.67093e-54	0.870132	80.28
KLRK1	turquoise	0.82823	5.63225e-44	0.82823	63.1623
KMO	turquoise	0.823056	5.99922e-43	0.823056	62.0184
L1TD1	turquoise	0.303572	0.000830819	0.303572	0.578029
LAMP3	turquoise	0.639868	7.48971e-20	0.639868	19.6714
LAPTM5	turquoise	0.864401	2.96233e-52	0.864401	79.6099
HSPC046	turquoise	0.778676	2.31607e-35	0.778676	45.2145
LAX1	turquoise	0.806834	6.0077e-40	0.806834	58.8976
LBP	turquoise	0.42375	1.97772e-07	0.42375	3.16714
LCN10	turquoise	0.793317	1.18552e-37	0.793317	59.6587
LOC220083	turquoise	0.877353	8.02196e-56	0.877353	81.9806
LEP	turquoise	0.477998	1.13416e-09	0.477998	7.65076
LGALS12	turquoise	0.38398	4.59075e-06	0.38398	4.595
LILRA4	turquoise	0.752847	1.0681e-31	0.752847	40.6309
LILRB1	turquoise	0.852525	2.70624e-49	0.852525	73.4177
LINGO3	turquoise	0.520776	7.92768e-12	0.520776	9.27397
LINC00426	turquoise	0.925976	3.54035e-74	0.925976	117.519
PCED1B-AS1	turquoise	0.945381	1.87966e-85	0.945381	130.382
LOC100272216	turquoise	0.426478	1.58282e-07	0.426478	3.35389
LOC606724	turquoise	0.84083	1.27213e-46	0.84083	81.5992
BMS1P20	turquoise	0.584556	1.04455e-15	0.584556	12.922
NRROS	turquoise	0.826706	1.14079e-43	0.826706	61.3713
LSP1	turquoise	0.854988	6.93147e-50	0.854988	75.8327
LST1	turquoise	0.576267	3.69863e-15	0.576267	16.4779
LTA	turquoise	0.892685	1.28386e-60	0.892685	104.467
LTB	turquoise	0.832986	5.96273e-45	0.832986	73.0466
LY86	turquoise	0.876621	1.3096e-55	0.876621	84.0588
LY9	turquoise	0.953956	7.66605e-92	0.953956	137.676
MADCAM1	turquoise	0.458991	8.05807e-09	0.458991	4.65091
MAL	turquoise	0.77997	1.4751e-35	0.77997	58.3481
MAP1LC3C	turquoise	0.622654	1.83023e-18	0.622654	16.1816
MAP4K1	turquoise	0.944395	8.73921e-85	0.944395	138.171
MARCH1	turquoise	0.846406	7.19442e-48	0.846406	74.8173
MATK	turquoise	0.688652	2.76113e-24	0.688652	27.6828
MCOLN2	turquoise	0.878444	3.87152e-56	0.878444	85.4436
MEF2C	turquoise	0.849046	1.78588e-48	0.849046	70.5894
MZB1	turquoise	0.700875	1.52051e-25	0.700875	28.8944
MIR155HG	turquoise	0.859582	5.08842e-51	0.859582	89.0238
MPEG1	turquoise	0.847311	4.46309e-48	0.847311	71.6901
MS4A1	turquoise	0.829185	3.60973e-44	0.829185	89.253
MUSK	turquoise	0.533016	1.67533e-12	0.533016	8.50114
MYBPC2	turquoise	0.462978	5.49073e-09	0.462978	6.5832
LOC392665	turquoise	0.912347	5.73929e-68	0.912347	106.516
NAPSB	turquoise	0.91024	4.2407e-67	0.91024	103.568
NCF1B	turquoise	0.903333	2.12762e-64	0.903333	105.693
LOC4687	turquoise	0.843746	2.88111e-47	0.843746	75.1742
NCF1	turquoise	0.88982	1.15343e-59	0.88982	98.9757
NCF4	turquoise	0.844149	2.34558e-47	0.844149	68.7292
NCKAP1L	turquoise	0.902438	4.55827e-64	0.902438	97.777
LOC154576	turquoise	0.895443	1.47871e-61	0.895443	111.809
NGFR	turquoise	0.406818	8.29195e-07	0.406818	3.79697
NKG7	turquoise	0.741344	3.30456e-30	0.741344	38.3141
NLRC3	turquoise	0.940072	5.37917e-82	0.940072	126.727
FCU	turquoise	0.648021	1.57536e-20	0.648021	22.6335
NR4A3	turquoise	0.356666	3.15333e-05	0.356666	1.86232
TENM2	turquoise	0.0618778	1	0.0618778	1.78017
P2RX5	turquoise	0.818098	5.38692e-42	0.818098	78.7885
P2RY10	turquoise	0.936322	9.69776e-80	0.936322	127.099
P2RY12	turquoise	0.58729	6.80773e-16	0.58729	14.3951
P2RY8	turquoise	0.935934	1.62786e-79	0.935934	117.547
PADI4	turquoise	0.60498	3.95286e-17	0.60498	12.9671
PAPLN	turquoise	0.690979	1.61024e-24	0.690979	25.615
PARP15	turquoise	0.843199	3.81377e-47	0.843199	85.2661
PARVG	turquoise	0.909751	6.65073e-67	0.909751	101.41
PAX5	turquoise	0.861974	1.25106e-51	0.861974	103.468
PCOLCE2	turquoise	0.32635	0.000239515	0.32635	0.949419
SLEB2	turquoise	0.848497	2.38358e-48	0.848497	73.033
PDE4B	turquoise	0.770355	3.93382e-34	0.770355	43.6433
PDE6G	turquoise	0.772471	1.95056e-34	0.772471	45.3909
PIK3CD	turquoise	0.948602	1.01367e-87	0.948602	124.779
PIK3R5	turquoise	0.799795	9.88321e-39	0.799795	56.9618
PIK3R6	turquoise	0.682358	1.1195e-23	0.682358	27.8968
PKHD1L1	turquoise	0.347204	6.14275e-05	0.347204	1.16172
SPLA2S	turquoise	0.787257	1.10652e-36	0.787257	51.1025
PLCB2	turquoise	0.531557	2.01574e-12	0.531557	7.57311
PLD4	turquoise	0.719183	1.50569e-27	0.719183	32.7861
PLEK	turquoise	0.851364	5.11242e-49	0.851364	73.7425
PLIN1	turquoise	0.495025	1.69968e-10	0.495025	10.1626
PMCH	turquoise	0.45581	1.10896e-08	0.45581	3.6174
PNOC	turquoise	0.737032	1.14659e-29	0.737032	37.9317
POU2AF1	turquoise	0.87218	2.37173e-54	0.87218	100.057
POU2F2	turquoise	0.928495	1.86951e-75	0.928495	124.708
PPP1R16B	turquoise	0.916243	1.25024e-69	0.916243	106.637
LOC149730	turquoise	0.836832	9.22959e-46	0.836832	66.5231
PRF1	turquoise	0.647824	1.61719e-20	0.647824	21.5226
PRKCB	turquoise	0.927162	8.96254e-75	0.927162	120.56
PRKCQ	turquoise	0.733321	3.27835e-29	0.733321	34.5221
PSTPIP1	turquoise	0.864042	3.66925e-52	0.864042	78.4844
LOC89959	turquoise	0.709147	1.98778e-26	0.709147	31.625
AS1	turquoise	0.636375	1.4547e-19	0.636375	17.8837
PTGDS	turquoise	0.60762	2.53377e-17	0.60762	15.0739
PTPN22	turquoise	0.725013	3.16587e-28	0.725013	34.4027
PTPN7	turquoise	0.851003	6.2093e-49	0.851003	74.9078
PTPRCAP	turquoise	0.858704	8.42585e-51	0.858704	93.4452
PTPRC	turquoise	0.941984	3.33332e-83	0.941984	123.348
PTX3	turquoise	0.477068	1.24356e-09	0.477068	5.27234
PYHIN1	turquoise	0.952059	2.50142e-90	0.952059	125.39
RASAL3	turquoise	0.947959	2.94486e-87	0.947959	133.682
RASGRP2	turquoise	0.906414	1.39965e-65	0.906414	120.315
RASSF2	turquoise	0.838229	4.65728e-46	0.838229	65.7454
LOC105371602	turquoise	0.969346	3.57976e-107	0.969346	142.45
RFTN1	turquoise	0.787476	1.02556e-36	0.787476	47.2397
RGL4	turquoise	0.902757	3.4795e-64	0.902757	105.205
RGS1	turquoise	0.555853	7.4411e-14	0.555853	10.2049
RHOH	turquoise	0.925888	3.90607e-74	0.925888	124.488
RNASE6	turquoise	0.783592	4.10435e-36	0.783592	49.8087
RNF175	turquoise	0.496209	1.49387e-10	0.496209	5.08468
RUNX3	turquoise	0.826499	1.25026e-43	0.826499	62.6017
S1PR3	turquoise	0.55432	9.19298e-14	0.55432	9.28455
SAA1	turquoise	0.253579	0.0116793	0.253579	1.82036
SAMSN1	turquoise	0.741864	2.85237e-30	0.741864	41.3775
SASH3	turquoise	0.984399	7.66716e-133	0.984399	149.929
SCML4	turquoise	0.878313	4.22118e-56	0.878313	92.4215
HYKPP	turquoise	0.598068	1.23777e-16	0.598068	13.8661
LNHR	turquoise	0.895069	1.98336e-61	0.895069	113.447
SEPT1	turquoise	0.911188	1.73276e-67	0.911188	122.128
SH2D1A	turquoise	0.941924	3.63599e-83	0.941924	122.638
SHISA3	turquoise	0.529866	2.47409e-12	0.529866	7.24098
SIGLEC10	turquoise	0.644036	3.37256e-20	0.644036	20.5495
SIGLEC14	turquoise	0.745762	9.04696e-31	0.745762	39.1041
SIGLEC5	turquoise	0.77206	2.2324e-34	0.77206	47.4159
LOC100131600	turquoise	0.943877	1.93536e-84	0.943877	127.63
SIT1	turquoise	0.946843	1.82723e-86	0.946843	135.236
SLA2	turquoise	0.915877	1.80168e-69	0.915877	102.379
SLAMF1	turquoise	0.948533	1.13503e-87	0.948533	121.211
SLAMF6	turquoise	0.93765	1.60177e-80	0.93765	121.049
LOC157759	turquoise	0.84868	2.16736e-48	0.84868	72.4798
SLC2A5	turquoise	0.415318	4.0123e-07	0.415318	2.55378
FLJ20839	turquoise	0.425577	1.69445e-07	0.425577	5.79382
SLFN12L	turquoise	0.709853	1.67073e-26	0.709853	35.817
SNX20	turquoise	0.927527	5.85417e-75	0.927527	108.436
SORCS1	turquoise	0.104275	1	0.104275	1.99674
LOC101928789	turquoise	0.907517	5.18e-66	0.907517	117.058
SPATC1	turquoise	0.777614	3.34404e-35	0.777614	48.1746
SPIB	turquoise	0.574854	4.55878e-15	0.574854	13.3999
SPN	turquoise	0.821129	1.4167e-42	0.821129	63.4493
SRGN	turquoise	0.73121	5.83395e-29	0.73121	37.5546
ST8SIA4	turquoise	0.644361	3.18668e-20	0.644361	20.1563
STAP1	turquoise	0.87958	1.79341e-56	0.87958	111.537
STAT4	turquoise	0.811502	8.87214e-41	0.811502	56.0418
STX11	turquoise	0.693776	8.35291e-25	0.693776	30.8827
SUSD3	turquoise	0.91703	5.63228e-70	0.91703	114.287
LOC100128403	turquoise	0.0693683	1	0.0693683	1.55295
IDDM21	turquoise	0.965358	1.49702e-102	0.965358	135.817
LOC155236	turquoise	0.670879	1.4002e-22	0.670879	23.1742
TBC1D10C	turquoise	0.914381	7.95987e-69	0.914381	121.331
TBLYM	turquoise	0.859844	4.38101e-51	0.859844	75.9723
TCL1A	turquoise	0.820441	1.91849e-42	0.820441	80.7302
TCL6	turquoise	0.538702	7.92912e-13	0.538702	8.5698
TDO2	turquoise	0.451125	1.72786e-08	0.451125	4.4345
THEMIS	turquoise	0.866507	8.25362e-53	0.866507	84.2649
TIFAB	turquoise	0.656298	2.97327e-21	0.656298	24.1076
TIGIT	turquoise	0.95803	2.55768e-95	0.95803	133.748
TIMD4	turquoise	0.703671	7.72064e-26	0.703671	34.5949
TLR10	turquoise	0.898385	1.36767e-62	0.898385	116.276
TLR6	turquoise	0.771872	2.36707e-34	0.771872	48.8628
TMC8	turquoise	0.898642	1.10864e-62	0.898642	113.598
TMEM156	turquoise	0.59866	1.13011e-16	0.59866	16.1248
TMEM71	turquoise	0.517135	1.22011e-11	0.517135	6.10803
TNFAIP3	turquoise	0.640266	6.98365e-20	0.640266	17.9038
TNFAIP8L2	turquoise	0.809018	2.46916e-40	0.809018	58.1829
TNFRSF13B	turquoise	0.79752	2.3983e-38	0.79752	71.5656
TNFRSF13C	turquoise	0.847367	4.34805e-48	0.847367	99.2876
TNFRSF17	turquoise	0.761789	6.4835e-33	0.761789	43.7983
TNFRSF8	turquoise	0.685547	5.56818e-24	0.685547	26.6825
TNFRSF9	turquoise	0.718241	1.9209e-27	0.718241	33.8684
TNFSF8	turquoise	0.909714	6.86699e-67	0.909714	107.609
LOC116403	turquoise	0.44128	4.34382e-08	0.44128	4.66225
TRAF3IP3	turquoise	0.965606	8.02792e-103	0.965606	144.714
HSPC062	turquoise	0.906712	1.07264e-65	0.906712	102.347
TREML1	turquoise	0.89348	6.9383e-61	0.89348	100.672
LOC221440	turquoise	0.685671	5.445e-24	0.685671	30.0075
TRIM22	turquoise	0.796187	3.98503e-38	0.796187	52.5624
TRPM2	turquoise	0.432871	9.12022e-08	0.432871	3.59233
TSHR	turquoise	0.20848	0.0663169	0.20848	0.314136
LOC100131093	turquoise	0.0671045	1	0.0671045	1.50417
LOC648953	turquoise	0.869874	1.01526e-53	0.869874	93.88
TUSC5	turquoise	0.51716	1.22011e-11	0.51716	10.6586
LST001	turquoise	0.788739	6.46244e-37	0.788739	48.0323
NME8	turquoise	0.502234	7.34542e-11	0.502234	7.58455
LOC100134052	turquoise	0.927567	5.59535e-75	0.927567	119.016
VAV1	turquoise	0.623569	1.56103e-18	0.623569	16.8257
VCAM1	turquoise	0.29391	0.00143377	0.29391	0.751764
VPREB3	turquoise	0.850657	7.4763e-49	0.850657	100.209
THC	turquoise	0.967093	1.71881e-104	0.967093	133.954
WDFY4	turquoise	0.972161	8.06908e-111	0.972161	143.336
WIPF1	turquoise	0.856425	3.09118e-50	0.856425	75.3349
XCL2	turquoise	0.68425	7.36138e-24	0.68425	25.9755
ZAP70	turquoise	0.934681	8.44359e-79	0.934681	128.443
ZBP1	turquoise	0.468155	3.19009e-09	0.468155	4.75332
ZBTB32	turquoise	0.885816	2.20955e-58	0.885816	102.925
C6orf95	turquoise	0.899509	5.41049e-63	0.899509	106.523
ZNF80	turquoise	0.870123	8.69287e-54	0.870123	87.2258
ZNF831	turquoise	0.603932	4.6889e-17	0.603932	14.5777
ACSS3	brown	0.678139	5.9474e-24	0.678139	6.62652
CAR10	brown	0.868189	9.80422e-54	0.868189	19.2485
MDC2	brown	0.731709	1.31731e-29	0.731709	9.03001
ADAMTS12	brown	0.716194	7.66121e-28	0.716194	11.2066
ADAMTS16	brown	0.551258	1.79449e-14	0.551258	3.56348
LOC145757	brown	0.514424	1.40693e-12	0.514424	1.45898
ALPK2	brown	0.765905	5.6521e-34	0.765905	10.2054
CLMP	brown	0.728289	3.19071e-29	0.728289	8.53616
ASPN	brown	0.789461	1.62403e-37	0.789461	12.0495
BICC1	brown	0.5391	9.04092e-14	0.5391	2.79452
BNC2	brown	0.898906	2.79048e-63	0.898906	20.5899
C1R	brown	0.812268	2.16594e-41	0.812268	13.9269
C1S	brown	0.827306	3.00113e-44	0.827306	14.9392
LAMP5	brown	0.563689	3.34235e-15	0.563689	2.85899
CCDC80	brown	0.815749	4.93749e-42	0.815749	14.6894
LOC92435	brown	0.731209	1.48299e-29	0.731209	8.23145
CCL11	brown	0.56511	2.9134e-15	0.56511	2.7066
CDH11	brown	0.913308	6.87692e-69	0.913308	23.9344
CHRNA1	brown	0.463568	3.81953e-10	0.463568	1.09022
CILP2	brown	0.629947	8.38178e-20	0.629947	5.951
LOC93042	brown	0.754799	1.80071e-32	0.754799	14.0828
COL11A1	brown	0.706341	9.3314e-27	0.706341	11.2738
COL15A1	brown	0.645937	4.54152e-21	0.645937	4.52288
COL1A2	brown	0.846825	2.07193e-48	0.846825	19.5736
COL3A1	brown	0.898006	5.8187e-63	0.898006	23.1504
COL5A2	brown	0.880535	2.93086e-57	0.880535	23.1763
COL6A3	brown	0.899973	1.15533e-63	0.899973	22.9731
COL8A1	brown	0.859985	1.37604e-51	0.859985	19.0935
COL8A2	brown	0.753082	3.01676e-32	0.753082	11.623
LOC125450	brown	0.750076	7.33022e-32	0.750076	10.1286
EDM1	brown	0.567727	2.08693e-15	0.567727	2.75282
CORIN	brown	0.731786	1.31659e-29	0.731786	9.95199
CPXM1	brown	0.723136	1.27127e-28	0.723136	9.62347
CRISPLD1	brown	0.765085	7.28562e-34	0.765085	10.1917
CST2	brown	0.265526	0.000655507	0.265526	0.177327
CTGF	brown	0.797161	9.06815e-39	0.797161	11.7621
CTHRC1	brown	0.792589	5.09167e-38	0.792589	15.326
CTSK	brown	0.886992	2.93846e-59	0.886992	21.3282
CYR61	brown	0.689592	4.86629e-25	0.689592	6.10359
CYSLTR1	brown	0.0266511	0.72324	0.0266511	0.115029
CYTL1	brown	0.605656	5.86965e-18	0.605656	3.36305
DCN	brown	0.916818	2.09497e-70	0.916818	23.1184
DDR2	brown	0.752481	3.56865e-32	0.752481	10.8905
ECM2	brown	0.886082	5.67762e-59	0.886082	19.8011
LOC392794	brown	0.77228	7.00642e-35	0.77228	10.7697
FAM26E	brown	0.82132	4.40611e-43	0.82132	13.7265
FAP	brown	0.889697	4.00528e-60	0.889697	21.4013
FBLN1	brown	0.800413	2.60349e-39	0.800413	14.0682
FBLN2	brown	0.828232	1.96976e-44	0.828232	14.242
FBN1	brown	0.929537	1.58005e-76	0.929537	24.6141
FGF10	brown	0.644435	5.88821e-21	0.644435	5.16258
FGF7	brown	0.694052	1.74352e-25	0.694052	6.74152
FIBIN	brown	0.837996	1.8355e-46	0.837996	15.2915
FMO1	brown	0.635673	3.0883e-20	0.635673	4.58358
FNDC1	brown	0.82189	3.45082e-43	0.82189	13.6581
GAS1	brown	0.821159	4.6799e-43	0.821159	14.8339
KFM	brown	0.655683	6.60968e-22	0.655683	4.55086
GFPT2	brown	0.748388	1.17995e-31	0.748388	9.82077
GNB4	brown	0.810212	5.08632e-41	0.810212	12.9544
GREMLIN	brown	0.522218	6.52049e-13	0.522218	2.43691
LOC732216	brown	0.889135	6.06299e-60	0.889135	19.1816
ARMD1	brown	0.841398	3.39618e-47	0.841398	16.8183
IGDCC4	brown	0.67384	1.4949e-23	0.67384	6.55529
IGFBP5	brown	0.530632	2.6045e-13	0.530632	2.38796
CXCL8	brown	0.283205	0.00036696	0.283205	0.177089
INHBA	brown	0.700491	3.77884e-26	0.700491	9.49785
ISM1	brown	0.7439	4.26917e-31	0.7439	9.46031
ITGBL1	brown	0.81873	1.35953e-42	0.81873	13.9944
KLHL4	brown	0.446598	1.84937e-09	0.446598	0.752642
LUM	brown	0.931549	1.34194e-77	0.931549	23.9973
MATN3	brown	0.613101	1.69053e-18	0.613101	4.56724
MFAP5	brown	0.806702	2.12344e-40	0.806702	12.5548
MMP2	brown	0.840087	6.54802e-47	0.840087	16.1063
MOXD1	brown	0.749967	7.44298e-32	0.749967	10.6834
NCAM2	brown	0.584795	1.74539e-16	0.584795	2.5429
NOX4	brown	0.773471	4.73738e-35	0.773471	12.6983
NRK	brown	0.828695	1.60307e-44	0.828695	14.899
LOC139770	brown	0.68392	1.70853e-24	0.68392	7.56607
TENM3	brown	0.801428	1.76393e-39	0.801428	11.5812
OLFML1	brown	0.891013	1.48284e-60	0.891013	19.8914
OLFML2B	brown	0.827259	3.03338e-44	0.827259	13.9419
OLFML3	brown	0.764746	8.01366e-34	0.764746	11.5176
OMD	brown	0.780677	3.90098e-36	0.780677	12.3439
P4HA3	brown	0.756793	9.96655e-33	0.756793	10.7206
PDGFRA	brown	0.746035	2.35041e-31	0.746035	10.0443
PDGFRL	brown	0.809786	6.00257e-41	0.809786	13.7449
PDPN	brown	0.729678	2.22207e-29	0.729678	9.2057
PLXDC2	brown	0.866163	3.41014e-53	0.866163	18.018
PMP22	brown	0.581995	2.45921e-16	0.581995	2.32331
PPFIA2	brown	0.687676	7.3962e-25	0.687676	6.25648
PRELP	brown	0.583262	2.11947e-16	0.583262	3.44727
PRICKLE1	brown	0.763938	1.02692e-33	0.763938	9.93897
PRRX1	brown	0.873161	4.14411e-55	0.873161	19.5898
PTGIS	brown	0.346403	8.13717e-06	0.346403	0.223513
HACD4	brown	0.704283	1.5213e-26	0.704283	7.28639
RAB31	brown	0.910461	1.04643e-67	0.910461	22.5934
RECK	brown	0.848843	7.11018e-49	0.848843	17.0338
SERPINE1	brown	0.528299	3.24894e-13	0.528299	2.00034
SERPINF1	brown	0.744766	3.3665e-31	0.744766	11.0959
SFRP2	brown	0.830548	6.75565e-45	0.830548	14.4869
SLITRK4	brown	0.517987	1.00874e-12	0.517987	1.49279
SORCS2	brown	0.664095	1.18475e-22	0.664095	4.63586
MGC10724	brown	0.842484	1.98564e-47	0.842484	15.6018
SRPX2	brown	0.792852	4.67233e-38	0.792852	11.6734
SIAT2	brown	0.841639	3.03339e-47	0.841639	16.9181
SULF1	brown	0.769727	1.63533e-34	0.769727	13.5664
TGFB3	brown	0.718617	4.15003e-28	0.718617	8.45506
THBS1	brown	0.799614	3.52173e-39	0.799614	11.5705
THBS2	brown	0.835041	7.82497e-46	0.835041	19.5749
LOC94105	brown	0.840036	6.65127e-47	0.840036	15.7094
TNFAIP6	brown	0.735397	4.84683e-30	0.735397	9.35428
TNFSF4	brown	0.681165	3.10435e-24	0.681165	7.77412
VCAN	brown	0.826646	3.98592e-44	0.826646	16.6442
LOC51159	brown	0.767219	3.71773e-34	0.767219	9.61576
WISP1	brown	0.888039	1.36492e-59	0.888039	19.2903
WISP2	brown	0.563776	3.34235e-15	0.563776	2.62494
WT1AS	brown	0.741792	7.79004e-31	0.741792	8.99701
WNT2	brown	0.630679	7.61609e-20	0.630679	5.71582
WT1	brown	0.7553	1.56578e-32	0.7553	10.6149
XIRP1	brown	0.487672	3.0812e-11	0.487672	1.75372
ZFPM2	brown	0.920007	7.67009e-72	0.920007	23.1088
ZNF521	brown	0.902009	2.07176e-64	0.902009	20.9929
A2M	blue	0.785526	1.05224e-36	0.785526	12.7528
ABCA6	blue	0.777477	1.71974e-35	0.777477	12.2451
ABCA8	blue	0.885444	1.35977e-58	0.885444	22.6031
ABCA9	blue	0.795258	2.86226e-38	0.795258	13.47
ABCC9	blue	0.754517	3.23173e-32	0.754517	10.478
FLJ21551	blue	0.875251	1.57825e-55	0.875251	20.6194
ADAM23	blue	0.544762	9.57319e-14	0.544762	2.16787
ADAMTS1	blue	0.766907	6.18347e-34	0.766907	12.4878
KIAA0366	blue	0.882173	1.40573e-57	0.882173	21.9077
ADAMTSL1	blue	0.670249	6.86638e-23	0.670249	6.60729
LOC130935	blue	0.440621	6.72015e-09	0.440621	0.89395
ADH1B	blue	0.833413	2.60237e-45	0.833413	17.9288
ANGPT1	blue	0.751361	8.39376e-32	0.751361	10.9247
AOX1	blue	0.375268	1.13348e-06	0.375268	0.61168
APOD	blue	0.577915	8.57248e-16	0.577915	3.38269
DO	blue	0.812069	3.66588e-41	0.812069	14.7531
ASPA	blue	0.814297	1.47496e-41	0.814297	14.9596
ATP8B4	blue	0.84621	4.21882e-48	0.84621	17.9993
AVPR1A	blue	0.559022	1.38536e-14	0.559022	2.38499
BCHE	blue	0.70062	7.22552e-26	0.70062	7.13958
BHLHE22	blue	0.740537	2.06894e-30	0.740537	9.48807
FLJ20001	blue	0.914768	2.32466e-69	0.914768	25.2776
BOC	blue	0.845938	4.83675e-48	0.845938	18.2139
MEDAG	blue	0.634378	7.44237e-20	0.634378	6.1804
C16ORF89	blue	0.711313	5.15758e-27	0.711313	9.479
MIR99AHG	blue	0.781936	3.77163e-36	0.781936	12.3378
C3	blue	0.626116	3.19411e-19	0.626116	4.20717
CPED1	blue	0.662122	3.65277e-22	0.662122	7.37337
C7	blue	0.887051	4.21821e-59	0.887051	22.402
CALCRL	blue	0.844304	1.13255e-47	0.844304	18.4622
CBLN4	blue	0.75258	5.83063e-32	0.75258	10.4481
CCL14	blue	0.711502	4.97788e-27	0.711502	10.5091
LOC115149	blue	0.649491	4.63728e-21	0.649491	4.80376
LOC116155	blue	0.63799	3.89004e-20	0.63799	4.56684
CHRDL1	blue	0.836304	6.3784e-46	0.836304	17.606
CILP	blue	0.617446	1.49985e-18	0.617446	4.61302
CLDN11	blue	0.590408	1.2827e-16	0.590408	3.72691
CMA1	blue	0.458793	1.47671e-09	0.458793	1.94182
CMAHP	blue	0.809063	1.25267e-40	0.809063	14.3994
COL14A1	blue	0.916547	3.91799e-70	0.916547	26.2537
COL21A1	blue	0.701419	6.01805e-26	0.701419	7.12478
CPA3	blue	0.606274	1.00816e-17	0.606274	4.58883
CRISPLD2	blue	0.717571	1.09381e-27	0.717571	10.2872
CTSG	blue	0.536721	2.78552e-13	0.536721	3.33233
CX3CR1	blue	0.507508	7.89224e-12	0.507508	1.98337
CXCL12	blue	0.780977	5.16006e-36	0.780977	12.8576
CYP1B1	blue	0.848202	1.48067e-48	0.848202	19.0312
ACKR1	blue	0.722801	2.78268e-28	0.722801	10.9621
DIO3	blue	0.52599	9.99234e-13	0.52599	2.46569
DOC2BL	blue	0.497271	2.43365e-11	0.497271	1.56802
DOK5	blue	0.397398	2.539e-07	0.397398	0.48921
DPT	blue	0.686209	2.13726e-24	0.686209	7.00239
EBF2	blue	0.814049	1.62803e-41	0.814049	15.5613
EBF3	blue	0.813258	2.24716e-41	0.813258	14.9957
DHRD	blue	0.808328	1.68532e-40	0.808328	15.2616
EGR2	blue	0.596	5.27261e-17	0.596	3.96037
ELN	blue	0.672267	4.49325e-23	0.672267	7.8425
EMCN	blue	0.778249	1.32585e-35	0.778249	13.5396
EPHA3	blue	0.682098	5.40465e-24	0.682098	8.57568
ERG	blue	0.914584	2.77498e-69	0.914584	26.0813
ERVFRD-1	blue	0.626668	3.0136e-19	0.626668	4.20783
ESR1	blue	0.709426	8.24205e-27	0.709426	7.793
F13A1	blue	0.657334	9.73711e-22	0.657334	6.02737
FAM107A	blue	0.648572	5.47703e-21	0.648572	6.09646
FAM180B	blue	0.737529	4.88934e-30	0.737529	11.1375
FAM198A	blue	0.84164	4.45454e-47	0.84164	18.7794
FAT4	blue	0.781711	4.04879e-36	0.781711	13.8943
FBLN5	blue	0.90825	1.16312e-66	0.90825	24.5336
FHL5	blue	0.830652	9.71513e-45	0.830652	16.2683
FMO2	blue	0.665	2.05338e-22	0.665	6.14961
FREM1	blue	0.720023	5.78538e-28	0.720023	8.00287
G6PC2	blue	0.450225	2.81587e-09	0.450225	1.65089
GAS7	blue	0.785455	1.06952e-36	0.785455	13.5752
GEM	blue	0.612716	3.38148e-18	0.612716	4.89644
GFRA1	blue	0.431687	1.44531e-08	0.431687	0.824494
GIMAP6	blue	0.840812	6.75097e-47	0.840812	18.4888
GIMAP8	blue	0.840187	9.21035e-47	0.840187	18.5243
GLI1	blue	0.640919	2.37711e-20	0.640919	7.01401
GLP2R	blue	0.727473	8.07952e-29	0.727473	9.36237
GPC3	blue	0.860689	1.38294e-51	0.860689	19.179
ADGRD1	blue	0.787412	5.37158e-37	0.787412	12.8401
LOC82154	blue	0.815308	9.6189e-42	0.815308	14.5813
HDC	blue	0.669844	7.37966e-23	0.669844	6.3732
DFNB39	blue	0.815951	7.33784e-42	0.815951	16.5682
HSD11B1	blue	0.713524	3.03183e-27	0.713524	8.58914
HTR2A	blue	0.743443	9.00933e-31	0.743443	9.91551
IGF1	blue	0.759137	7.6235e-33	0.759137	12.4457
IGSF10	blue	0.524239	1.20482e-12	0.524239	2.01597
IL1R1	blue	0.800713	3.49913e-39	0.800713	15.3307
IL33	blue	0.818878	2.08738e-42	0.818878	16.6429
INMT	blue	0.795858	2.29246e-38	0.795858	14.0038
ITGA8	blue	0.513382	4.2091e-12	0.513382	2.16891
ITGA4L	blue	0.512431	4.51517e-12	0.512431	2.70861
ITIH3	blue	0.455941	1.8453e-09	0.455941	1.45897
JAM2	blue	0.880494	4.52297e-57	0.880494	21.6761
KCNJ5	blue	0.102108	0.173799	0.102108	0.476224
KCNK2	blue	0.655405	1.4237e-21	0.655405	5.84262
KCNS2	blue	0.693335	4.08036e-25	0.693335	7.23539
LAMA2	blue	0.804127	9.16301e-40	0.804127	16.1683
LIN7A	blue	0.520369	1.81933e-12	0.520369	2.05533
LMO3	blue	0.33802	1.10941e-05	0.33802	0.855761
LINC01140	blue	0.846389	3.86473e-48	0.846389	18.2116
LPAR1	blue	0.79665	1.70307e-38	0.79665	13.9569
LRFN5	blue	0.851306	2.82379e-49	0.851306	17.7856
LRRTM3	blue	0.530835	5.49347e-13	0.530835	2.58415
LYVE1	blue	0.6811	6.68171e-24	0.6811	7.36732
MAN1C1	blue	0.785684	1.00249e-36	0.785684	11.9257
MCTP1	blue	0.676459	1.83798e-23	0.676459	6.43457
MEOX1	blue	0.631852	1.17393e-19	0.631852	4.9104
MEOX2	blue	0.676796	1.73019e-23	0.676796	6.53214
MGP	blue	0.781661	4.0834e-36	0.781661	12.3395
MMRN1	blue	0.45595	1.8453e-09	0.45595	1.30548
C18orf3	blue	0.640933	2.37711e-20	0.640933	4.88445
IGER	blue	0.63936	3.04707e-20	0.63936	5.68371
MYOZ3	blue	0.640293	2.59307e-20	0.640293	6.40757
LOC121318	blue	0.818298	2.67409e-42	0.818298	15.8889
NEFH	blue	0.587215	2.08952e-16	0.587215	2.99481
NHSL2	blue	0.713645	2.97434e-27	0.713645	9.73295
NTRK2	blue	0.583676	3.57291e-16	0.583676	3.4427
OGN	blue	0.894663	1.25865e-61	0.894663	23.5064
ODD	blue	0.534469	3.64281e-13	0.534469	2.83671
LOC116203	blue	0.807762	2.11198e-40	0.807762	15.4196
EFMR	blue	0.407231	1.22979e-07	0.407231	0.48464
LOC57123	blue	0.672529	4.30667e-23	0.672529	5.78786
PDE1A	blue	0.861704	7.64018e-52	0.861704	20.2546
PI16	blue	0.635216	6.47842e-20	0.635216	6.48982
PODN	blue	0.850283	4.87496e-49	0.850283	19.1082
PREX2	blue	0.779646	8.18909e-36	0.779646	14.3419
PRG4	blue	0.565323	5.64553e-15	0.565323	2.83922
PTGER3	blue	0.811481	4.66293e-41	0.811481	14.5681
PTPN5	blue	0.532693	4.45558e-13	0.532693	2.2745
RBMS3	blue	0.824609	1.61471e-43	0.824609	17.7362
RELN	blue	0.378765	1.02732e-06	0.378765	0.644029
RERGL	blue	0.522049	1.53271e-12	0.522049	2.30371
RGS22	blue	0.648072	5.9454e-21	0.648072	5.24738
RGS7BP	blue	0.551502	3.8383e-14	0.551502	2.9544
S100A12	blue	0.597663	4.10494e-17	0.597663	4.09137
S1PR1	blue	0.849581	7.08917e-49	0.849581	19.297
SCARA5	blue	0.81038	7.34893e-41	0.81038	16.2555
SCN4B	blue	0.851278	2.84888e-49	0.851278	18.2329
SCN7A	blue	0.805755	4.77212e-40	0.805755	15.1075
SDPR	blue	0.726972	9.16865e-29	0.726972	9.75652
SELE	blue	0.328323	1.44532e-05	0.328323	0.317556
SELP	blue	0.810182	7.91877e-41	0.810182	15.8473
LOC222113	blue	0.79194	1.00308e-37	0.79194	14.5627
SHE	blue	0.92933	2.8496e-76	0.92933	27.8584
SIGLEC17P	blue	0.663043	3.05788e-22	0.663043	6.24378
SLC17A7	blue	0.71579	1.72389e-27	0.71579	7.97948
SLC9A9	blue	0.857874	7.08064e-51	0.857874	19.1678
SLIT2	blue	0.801466	2.64035e-39	0.801466	15.9379
SLIT3	blue	0.867784	1.90532e-53	0.867784	21.0579
SPTA1	blue	0.552666	3.35718e-14	0.552666	2.87293
SRPX	blue	0.812155	3.56363e-41	0.812155	15.2406
STARD8	blue	0.820285	1.12725e-42	0.820285	15.2972
SULT1C	blue	0.468459	5.64647e-10	0.468459	1.29425
POLYDOM	blue	0.887742	2.54444e-59	0.887742	22.3836
TCF21	blue	0.727903	7.25862e-29	0.727903	9.36156
VMCM	blue	0.907214	2.97959e-66	0.907214	25.5178
THBS4	blue	0.601903	2.0689e-17	0.601903	3.8311
THSD7B	blue	0.501134	1.62332e-11	0.501134	2.60156
TLL1	blue	0.813964	1.67534e-41	0.813964	14.8231
TMEM119	blue	0.726413	1.05637e-28	0.726413	10.1927
TNFAIP8L3	blue	0.696714	1.84181e-25	0.696714	8.34924
LOC101060681	blue	0.711877	4.57807e-27	0.711877	9.14182
TPSAB1	blue	0.485542	8.99501e-11	0.485542	2.07869
TRIM63	blue	0.626331	3.13867e-19	0.626331	4.22148
ZCCHC24	blue	0.818234	2.73096e-42	0.818234	16.5654
LOC115481	blue	0.800878	3.30635e-39	0.800878	15.3597
ZNF366	blue	0.74226	1.26301e-30	0.74226	11.2231
LOC100505836	blue	0.37457	1.13348e-06	0.37457	0.431487
ACP5	red	0.624775	8.71302e-19	0.624775	12.8788
ACSM5	red	0.63378	1.76877e-19	0.63378	8.55481
ADAP2	red	0.85785	9.8398e-51	0.85785	26.7336
ADORA3	red	0.72797	1.11638e-28	0.72797	13.3083
LOC116399	red	0.853829	9.49604e-50	0.853829	26.4392
ALOX15B	red	0.326941	0.000167287	0.326941	0.457892
ALOX5AP	red	0.708845	1.66243e-26	0.708845	14.0517
AMICA1	red	0.720111	9.10935e-28	0.720111	13.2738
AOAH	red	0.846981	3.92924e-48	0.846981	26.2374
LOC220567	red	0.571601	5.0393e-15	0.571601	5.18909
APOC1	red	0.557607	3.81563e-14	0.557607	9.73226
APOC2	red	0.320249	0.000223356	0.320249	0.47861
AD2	red	0.482013	4.45129e-10	0.482013	6.30057
APOL4	red	0.662361	6.71972e-22	0.662361	7.96486
AQP9	red	0.713078	5.71172e-27	0.713078	14.6466
FLJ38708	red	0.58467	7.29045e-16	0.58467	5.60391
BASP1	red	0.597992	8.93957e-17	0.597992	7.9655
C10ORF128	red	0.761582	5.65129e-33	0.761582	18.1314
FAM216B	red	0.124958	0.191167	0.124958	0.421443
C19ORF38	red	0.445925	1.93962e-08	0.445925	1.84115
MCEMP1	red	0.48558	3.13436e-10	0.48558	6.4039
LOC51089	red	0.794749	5.62388e-38	0.794749	21.5691
C1QB	red	0.819972	1.83434e-42	0.819972	23.8069
LOC90369	red	0.864751	1.69601e-52	0.864751	29.3059
C2	red	0.484544	3.46513e-10	0.484544	2.69571
C3AR1	red	0.933565	2.09339e-78	0.933565	37.9984
C5AR1	red	0.747058	4.92724e-31	0.747058	15.8048
CASS4	red	0.808289	2.6894e-40	0.808289	21.8998
CCL13	red	0.378093	6.68811e-06	0.378093	0.97333
CCL18	red	0.561083	2.36052e-14	0.561083	6.66491
CCR1	red	0.899875	2.54152e-63	0.899875	32.3416
LOC90262	red	0.7497	2.23115e-31	0.7497	20.3201
LOC727797	red	0.781217	7.67957e-36	0.781217	21.9762
CCR8	red	0.734144	2.10379e-29	0.734144	14.2741
CD101	red	0.646993	1.43422e-20	0.646993	7.49366
CD14	red	0.699845	1.4791e-25	0.699845	13.9388
CD163	red	0.784823	2.15126e-36	0.784823	18.9324
CD200R1	red	0.640322	5.10919e-20	0.640322	12.2127
CD209	red	0.557134	4.03097e-14	0.557134	6.02534
CD226	red	0.729444	7.63935e-29	0.729444	19.4843
CD300A	red	0.841778	5.88082e-47	0.841778	23.4445
LOC105371892	red	0.666799	2.66526e-22	0.666799	12.0474
CD300E	red	0.627901	5.05553e-19	0.627901	6.84197
CD300LB	red	0.681573	1.04619e-23	0.681573	9.31852
CD300LF	red	0.782029	5.81755e-36	0.782029	21.9278
LOC116196	red	0.89509	1.23972e-61	0.89509	30.9622
CD4	red	0.895796	7.13722e-62	0.895796	32.7101
CD84	red	0.803126	2.14936e-39	0.803126	24.571
CD86	red	0.923397	3.88447e-73	0.923397	35.6446
CEACAM4	red	0.626544	6.36308e-19	0.626544	6.06584
GP39	red	0.355226	2.8731e-05	0.355226	0.657737
CHIT1	red	0.299135	0.000807308	0.299135	0.338626
CHRNA6	red	0.557102	4.03097e-14	0.557102	5.64934
CLEC12A	red	0.707478	2.33127e-26	0.707478	11.7412
CLEC4A	red	0.867758	2.69004e-53	0.867758	26.2678
CLEC-6	red	0.695511	4.15468e-25	0.695511	9.52989
CLEC4E	red	0.629901	3.52243e-19	0.629901	6.35179
LOC154745	red	0.590163	3.12605e-16	0.590163	5.98752
CLEC6A	red	0.523072	3.62053e-12	0.523072	5.30224
CLEC7A	red	0.887222	5.14341e-59	0.887222	30.1931
CLIC2	red	0.707305	2.41649e-26	0.707305	11.3179
CMKLR1	red	0.758363	1.56193e-32	0.758363	15.4469
HVLP	red	0.64556	1.88709e-20	0.64556	5.90785
CSF1R	red	0.895366	1.00234e-61	0.895366	32.601
CSF2RA	red	0.819949	1.84396e-42	0.819949	20.3759
CSF3R	red	0.704904	4.34451e-26	0.704904	12.4983
CXCL10	red	0.501999	4.87547e-11	0.501999	5.95759
CXCL11	red	0.403392	8.84128e-07	0.403392	3.48814
CXCL5	red	0.178119	0.05117	0.178119	0.527413
CXCL9	red	0.496129	9.50752e-11	0.496129	5.85053
CXCR1	red	0.356116	2.788e-05	0.356116	1.79927
CXCR2	red	0.495213	1.04116e-10	0.495213	3.75933
CXORF21	red	0.78763	7.79668e-37	0.78763	21.5723
CYBB	red	0.886068	1.19496e-58	0.886068	30.5696
CYP19A1	red	0.272941	0.00240401	0.272941	0.213264
CYSLTR2	red	0.364138	1.68023e-05	0.364138	0.906167
DAZL	red	0.437688	4.2158e-08	0.437688	4.05884
DNAJC5B	red	0.789158	4.48043e-37	0.789158	17.7093
DOCK11	red	0.728755	9.05545e-29	0.728755	15.204
DTHD1	red	0.296637	0.00082937	0.296637	1.11447
EMILIN2	red	0.840077	1.37811e-46	0.840077	22.9087
ADGRE2	red	0.579555	1.61288e-15	0.579555	3.59569
ADGRE3	red	0.578421	1.90193e-15	0.578421	6.04493
F2RL2	red	0.43641	4.67527e-08	0.43641	1.37545
FABP3	red	0.290512	0.00111732	0.290512	0.183658
FAM49A	red	0.798326	1.42426e-38	0.798326	18.5764
TMEM255A	red	0.408524	5.89226e-07	0.408524	1.10189
FASLG	red	0.572383	4.58857e-15	0.572383	7.09885
FCAR	red	0.591785	2.42922e-16	0.591785	5.57749
FCER1G	red	0.895367	1.00234e-61	0.895367	33.9579
FCRI	red	0.808056	2.94607e-40	0.808056	22.7178
FCGR1B	red	0.76231	4.49629e-33	0.76231	17.8673
LOC644410	red	0.774021	9.43827e-35	0.774021	18.3321
FCGR2A	red	0.817954	4.42372e-42	0.817954	21.3958
FCGR2B	red	0.755461	3.847e-32	0.755461	13.9895
FCGR2C	red	0.769539	4.26429e-34	0.769539	15.0777
FCGR3A	red	0.785509	1.68631e-36	0.785509	18.5667
FCGR3B	red	0.438471	3.98716e-08	0.438471	2.03087
FCN1	red	0.400262	1.13306e-06	0.400262	2.67347
FGL2	red	0.666684	2.70896e-22	0.666684	10.5604
FGR	red	0.835478	1.35818e-45	0.835478	23.2354
FIGF	red	0.240594	0.00942385	0.240594	0.672619
KIAA0405	red	0.350566	3.75513e-05	0.350566	1.22013
FLVCR2	red	0.704385	4.90613e-26	0.704385	9.54951
FMO3	red	0.434096	5.72783e-08	0.434096	1.2731
FOLR2	red	0.660305	1.01622e-21	0.660305	10.9827
FPR1	red	0.788788	5.11095e-37	0.788788	17.3184
LOC116243	red	0.546546	1.69244e-13	0.546546	5.2769
FPR3	red	0.903872	8.35765e-65	0.903872	32.8498
GALNT16	red	0.277999	0.00197582	0.277999	1.03568
GBP1	red	0.550801	9.7099e-14	0.550801	5.34233
GBP5	red	0.547607	1.48024e-13	0.547607	5.86787
a1/3GTP	red	0.731615	4.22972e-29	0.731615	16.0529
GLDN	red	0.284608	0.00146635	0.284608	0.215019
GLIPR2	red	0.740821	3.10517e-30	0.740821	13.4124
GPNMB	red	0.851777	2.94925e-49	0.851777	25.2978
GPR141	red	0.770654	2.94824e-34	0.770654	20.0448
GPR34	red	0.757243	2.21207e-32	0.757243	18.5082
EX33	red	0.631727	2.5537e-19	0.631727	6.34053
ADGRG3	red	0.362799	1.80178e-05	0.362799	1.80202
HAVCR2	red	0.927151	5.43311e-75	0.927151	37.5878
HCK	red	0.862126	8.15312e-52	0.862126	27.2129
HK3	red	0.640666	4.82491e-20	0.640666	10.4399
HLA-DMB	red	0.840761	9.78824e-47	0.840761	24.6488
LOC221511	red	0.797944	1.64431e-38	0.797944	21.7047
GSE	red	0.626601	6.3623e-19	0.626601	8.08202
HLA-DRA	red	0.830176	1.73494e-44	0.830176	23.5472
HLA-DRB1	red	0.573594	3.86155e-15	0.573594	4.7791
HPGDS	red	0.368618	1.26426e-05	0.368618	0.855988
HRH2	red	0.644919	2.12142e-20	0.644919	7.4659
HRH4	red	0.23865	0.00942385	0.23865	0.414108
HS3ST2	red	0.505135	3.38819e-11	0.505135	6.64352
HTRA4	red	0.712724	6.21269e-27	0.712724	12.537
IDO	red	0.245685	0.00824891	0.245685	0.884745
IFI30	red	0.728807	8.98827e-29	0.728807	19.5779
IGSF6	red	0.885363	1.9802e-58	0.885363	30.92
IL10	red	0.52443	3.08528e-12	0.52443	5.05308
IL2RA	red	0.753724	6.56611e-32	0.753724	13.4542
ITGAM	red	0.764006	2.60807e-33	0.764006	17.1316
ITGB2	red	0.825517	1.51972e-43	0.825517	22.5321
KCNE1	red	0.499259	6.66333e-11	0.499259	2.7839
KIAA1755	red	0.557941	3.68448e-14	0.557941	4.15432
LAIR1	red	0.946053	3.64486e-86	0.946053	40.4439
LCP2	red	0.889271	1.12408e-59	0.889271	33.0213
LILRA1	red	0.781467	7.06918e-36	0.781467	19.1862
LILRA2	red	0.723039	4.24949e-28	0.723039	15.9317
LILRA3	red	0.576462	2.51531e-15	0.576462	4.65278
LILRA5	red	0.660458	9.92764e-22	0.660458	10.0894
LILRA6	red	0.817376	5.66769e-42	0.817376	21.6175
LILRB2	red	0.924002	1.9881e-73	0.924002	35.0999
LILRB3	red	0.834394	2.29672e-45	0.834394	25.2628
LILRB4	red	0.84109	8.31865e-47	0.84109	24.96
LILRB5	red	0.699772	1.49372e-25	0.699772	9.94595
LOC400760	red	0.532026	1.17228e-12	0.532026	4.67899
LOC100129963	red	0.561996	2.0917e-14	0.561996	6.03415
LOC653786	red	0.465001	2.73115e-09	0.465001	6.1414
LRRC25	red	0.901557	6.15092e-64	0.901557	31.8261
LRRC55	red	0.327573	0.000167287	0.327573	0.378701
FLJ45829	red	0.65832	1.52218e-21	0.65832	11.7273
LY96	red	0.78426	2.62272e-36	0.78426	16.8161
MARCO	red	0.428887	9.23617e-08	0.428887	3.30131
MEFV	red	0.793915	7.6494e-38	0.793915	17.6879
MERTK	red	0.792177	1.45462e-37	0.792177	18.7884
MMP12	red	0.337635	8.73851e-05	0.337635	0.498599
MNDA	red	0.887918	3.08296e-59	0.887918	30.4024
MPO	red	0.377679	6.68811e-06	0.377679	1.23005
LOC101928757	red	0.681427	1.07263e-23	0.681427	9.09584
MS4A16	red	0.68354	6.79644e-24	0.68354	9.06325
MS4A4	red	0.911158	1.10016e-67	0.911158	34.2343
LOC64166	red	0.930704	7.653e-77	0.930704	38.0124
MS4A7	red	0.904326	5.63227e-65	0.904326	31.8591
MSR1	red	0.859913	2.99702e-51	0.859913	26.7657
MYO1F	red	0.867551	3.04451e-53	0.867551	27.6154
NCF2	red	0.803488	1.86862e-39	0.803488	21.2604
NFAM1	red	0.896072	5.74089e-62	0.896072	30.6906
NLRC4	red	0.885407	1.92677e-58	0.885407	29.0609
PYPAF7	red	0.589086	3.67887e-16	0.589086	6.10621
NPL	red	0.857393	1.27343e-50	0.857393	25.5832
TRK	red	0.209855	0.0194575	0.209855	0.199476
OLR1	red	0.656019	2.38252e-21	0.656019	10.9697
OSCAR	red	0.600563	5.87971e-17	0.600563	11.5274
OSM	red	0.360954	2.00488e-05	0.360954	0.777924
OTOA	red	0.54892	1.24868e-13	0.54892	6.32044
P2RX7	red	0.729275	7.95022e-29	0.729275	15.8163
P2RY13	red	0.76673	1.07294e-33	0.76673	19.6761
PADI2	red	0.322702	0.000202697	0.322702	0.353639
PDCD1LG2	red	0.803539	1.8402e-39	0.803539	20.6993
PI15	red	0.389803	2.62494e-06	0.389803	0.693721
PIK3CG	red	0.702464	7.83679e-26	0.702464	16.4923
PILRA	red	0.882176	1.92848e-57	0.882176	31.2665
PKNOX2	red	0.355188	2.8731e-05	0.355188	0.782641
PLA2G2A	red	-0.0574091	0.445267	-0.0574091	0.46048
PLA2G5	red	0.391693	2.29847e-06	0.391693	0.943507
PLA2G7	red	0.720912	7.41013e-28	0.720912	16.2269
PLIN2	red	0.530104	1.48967e-12	0.530104	2.57471
PLXNC1	red	0.536136	6.86119e-13	0.536136	4.01176
PRAM1	red	0.622431	1.32151e-18	0.622431	11.259
LOC148456	red	0.682875	7.84601e-24	0.682875	9.81723
PTPRO	red	0.794033	7.35267e-38	0.794033	17.1292
RAB42	red	0.631453	2.66221e-19	0.631453	6.47554
RASGRP4	red	0.824024	2.99463e-43	0.824024	21.526
RGS18	red	0.820385	1.53414e-42	0.820385	24.8191
RNASE2	red	0.621953	1.42607e-18	0.621953	7.33306
S100A8	red	0.25675	0.00521711	0.25675	0.127732
SAMHD1	red	0.800957	5.08294e-39	0.800957	23.8354
LOC86801	red	0.214753	0.0194575	0.214753	3.84907
SFMBT2	red	0.587948	4.36804e-16	0.587948	7.72238
LOC147864	red	0.378019	6.68811e-06	0.378019	0.818966
SIGLEC12	red	0.338852	8.37088e-05	0.338852	0.464853
SIGLEC1	red	0.706254	3.12363e-26	0.706254	14.691
LOC100421066	red	0.89829	9.45076e-63	0.89829	33.7972
SIGLEC8	red	0.571794	4.95587e-15	0.571794	5.48593
LOC147644	red	0.918691	6.12606e-71	0.918691	35.644
LOC93149	red	0.752334	1.00241e-31	0.752334	16.0034
SIRPB2	red	0.908695	1.10226e-66	0.908695	32.2581
LOC126807	red	0.577093	2.30918e-15	0.577093	6.35564
SBBI42	red	0.857344	1.30361e-50	0.857344	26.7768
SLC16A6	red	0.657167	1.89829e-21	0.657167	7.78294
SLC1A3	red	0.730196	6.24276e-29	0.730196	13.9479
SLC24A4	red	0.592448	2.20466e-16	0.592448	6.70709
SLC37A2	red	0.483621	3.77938e-10	0.483621	1.65089
SLC6A15	red	0.323299	0.000202697	0.323299	4.18033
SLCO2B1	red	0.911959	5.1367e-68	0.911959	34.7897
SPI1	red	0.793357	9.4069e-38	0.793357	21.4117
STAC	red	0.29826	0.000807308	0.29826	0.775045
LOC102724424	red	0.864003	2.65717e-52	0.864003	28.5834
TIL	red	0.722736	4.5779e-28	0.722736	14.3551
TLR2	red	0.633476	1.85544e-19	0.633476	5.85298
TLR4	red	0.871714	2.20611e-54	0.871714	26.9882
TLR7-like	red	0.76057	7.77549e-33	0.76057	20.2419
LOC115806	red	0.806763	4.99107e-40	0.806763	22.6022
TM4SF19	red	0.407195	6.47689e-07	0.407195	3.87775
TM6SF1	red	0.858926	5.3043e-51	0.858926	26.2224
DCSTAMP	red	0.65256	4.78193e-21	0.65256	7.57484
TNFSF20	red	0.733844	2.27479e-29	0.733844	14.4985
TNFSF18	red	0.375901	7.32773e-06	0.375901	1.12933
TNNT3	red	0.366976	1.39311e-05	0.366976	4.34518
TREM1	red	0.467016	2.24378e-09	0.467016	4.70472
TREM2	red	0.658061	1.59207e-21	0.658061	11.023
TSKS	red	0.473346	1.14838e-09	0.473346	4.10192
PLOSL	red	0.793137	1.01686e-37	0.793137	23.7184
VSIG4	red	0.768125	6.79589e-34	0.768125	17.498
XAGE5	red	0.227832	0.0129612	0.227832	4.13533
XCR1	red	0.542349	2.98491e-13	0.542349	6.94978
ZNF518B	red	0.647598	1.28342e-20	0.647598	9.37695
ZNF804A	red	0.84248	4.12106e-47	0.84248	23.5085
GABRP	grey	0.0586058	1	0.0586058	3.24668e-06
PENK	grey	0.93601	2.07092e-81	0.93601	0.229887
REG3G	grey	0.097606	0.774628	0.097606	4.02992e-06
S100A9	grey	-0.0513043	1	-0.0513043	1.73468e-06
SLC47A1	grey	0.927166	1.09776e-76	0.927166	0.229881
XPNPEP2	grey	-0.0348464	1	-0.0348464	9.14042e-08
